# Supplementary material for: Clinicopathological Manifestations and Immune Phenotypes in Adult-onset Immunodeficiency With Anti-interferon-γ Autoantibodies
Source: Research Square preprint supplement (doi:10.21203/rs.3.rs-562260/v1), 2021-06-04
Supplement: Supplementary file 1 [file af283df22469f0b6b2af91f4.docx]

| Supplementary Table 1. Lymphocytes subpopulations in the cases leaving therapy and healthy controls with older age | | | |
| --- | --- | --- | --- |
|  | Cases (N = 12) | Controls (N = 18) | *P* value |
| Age (yr) | 64.5±11.1 | 60.6±4.9 | 0.236 |
| T cells (% lymphocytes) | 50.0±14.6 | 65.8±8.6 | 0.004 |
| CD4+ T cells (% T cells) | 20.3±6.9 | 33.9±7.4 | <0.001 |
| CD45RA+CD62L+CD31+ (% CD4+ cells) | 7.6±5.4 | 21.8±8.2 | <0.001 |
| CD38+HLA-DR+ (% CD4+ cells) | 18.3±14.8 | 4.8±1.4 | 0.009 |
| TEM (% CD4+ cells) | 64.8±9.0 | 41.6±11.4 | <0.001 |
| Th1-like (% CD4+ cells) | 40.5±10.7 | 20.4±7.3 | <0.001 |
| Th17-like (% CD4+ cells) | 33.6±9.4 | 19.5±5.5 | <0.001 |
| CD8+ T cells (% T cells) | 24.8±8.8 | 25.4±7.9 | 0.841 |
| CD45RA+CD62L+CD31+ (% CD8+ cells) | 5.2±4.5 | 15.8±6.6 | <0.001 |
| CD38+HLA-DR+ (% CD8+ cells) | 29.3±16.0 | 16.4±10.2 | 0.025 |
| TEM (% CD8+ cells) | 56.6±11.6 | 45.2±14.5 | 0.024 |
| TEM CCR5+ (% CD8+ cells) | 37.0±13.3 | 30.0±11.3 | 0.152 |
| Regulatory T (Treg) cells (% T cells) | 6.8±4.0 | 5.0±1.5 | 0.142 |
| Naïve (% Treg cells) | 21.5±11.4 | 33.7±11.7 | 0.013 |
| Memory (% Treg cells) | 78.5±12.4 | 66.3±11.7 | 0.013 |
| HLA-DR+ (% Treg cells) | 26.5±15.4 | 14.8±4.1 | 0.024 |
| NK cells (% lymphocytes) | 40.2±16.9 | 24.4±10.0 | 0.009 |
| CD56bright (% NK cells) | 2.1±1.1 | 4.5±2.9 | 0.004 |
| CD56+CD16+ (% NK cells) | 77.0±12.7 | 93.8±3.4 | <0.001 |
| Nkp30 (% NK cells) | 19.4±11.1 | 49.0±11.2 | <0.001 |
| Nkp46 (% NK cells) | 12.3±6.1 | 40.3±11.4 | <0.001 |
| CD57+ (% NK cells) | 80.9±7.2 | 59.0±11.2 | <0.001 |
| Data presented in means ± standard deviation | | | |
| *Significance of the differences between cases and controls | | | |
